# Supplementary material for: A reclaimed piezoelectric catalyst of MoS2@TNr composites as high-performance anode materials for supercapacitors
Source: Royal Society of Chemistry journal article supplement (doi:10.1039/d0ra06532c), 2020-01-01
Supplement: d0ra06532c1.pdf [file d0ra06532c1.pdf]

**Reclaimed Piezoelectric Catalyst of MoS<sub>2</sub>@TNr Composites as High-Performance Anode Materials for Supercapacitor**

Xiaona Zhao<sup>1,2</sup>, Yuanchao Lei<sup>1</sup>, Gang Liu<sup>1</sup>, Libing Qian<sup>1</sup>, Xiaowei Zhang<sup>1</sup>, Yunjie Ping<sup>1</sup>, Hongjing Li<sup>1</sup>, Qing Han<sup>1</sup>, Pengfei Fang<sup>1\*</sup>, Chunqing He<sup>1</sup>

1. *School of Physics and Technology, Key Laboratory of Nuclear Solid State Physics Hubei Province, Wuhan University, Wuhan 430072, China*

2. *School of Remote Sensing and Information Engineering, Wuhan University, Wuhan University, Wuhan 430072, China*

\*Corresponding author

Tel.: +86 27 6875 2003;

Fax: +86 27 6875 2003.

E-mail address: [fangpf@whu.edu.cn](mailto:fangpf@whu.edu.cn) (Pengfei Fang)

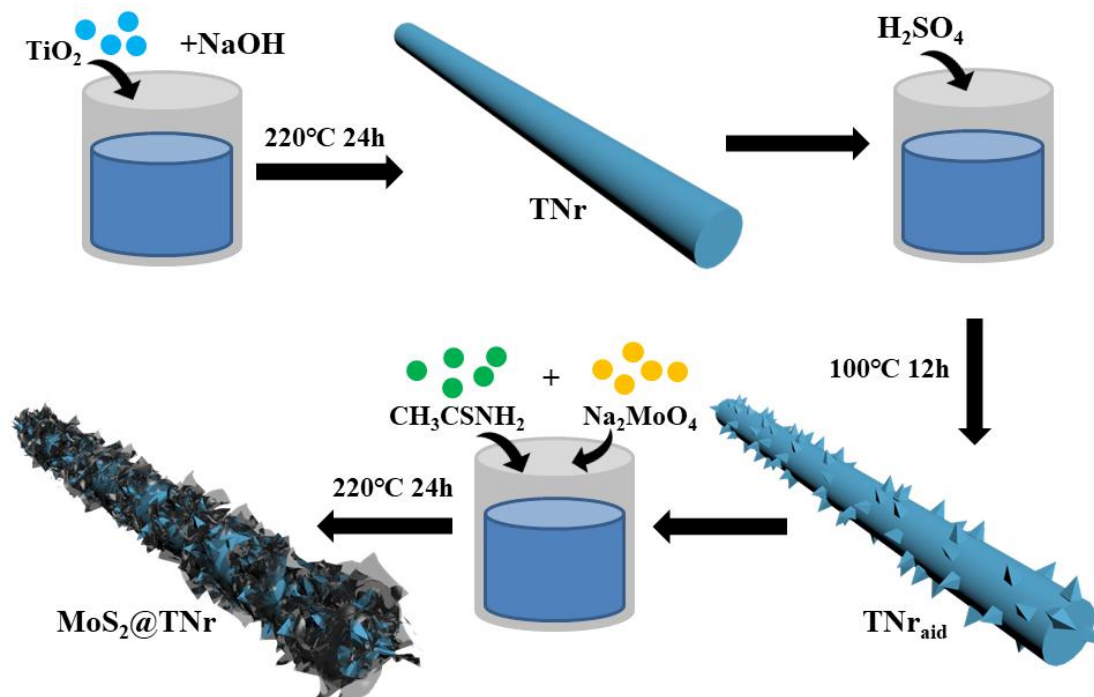

Fig. S1. The synthesis process of the MoS<sub>2</sub>@TNR composites.

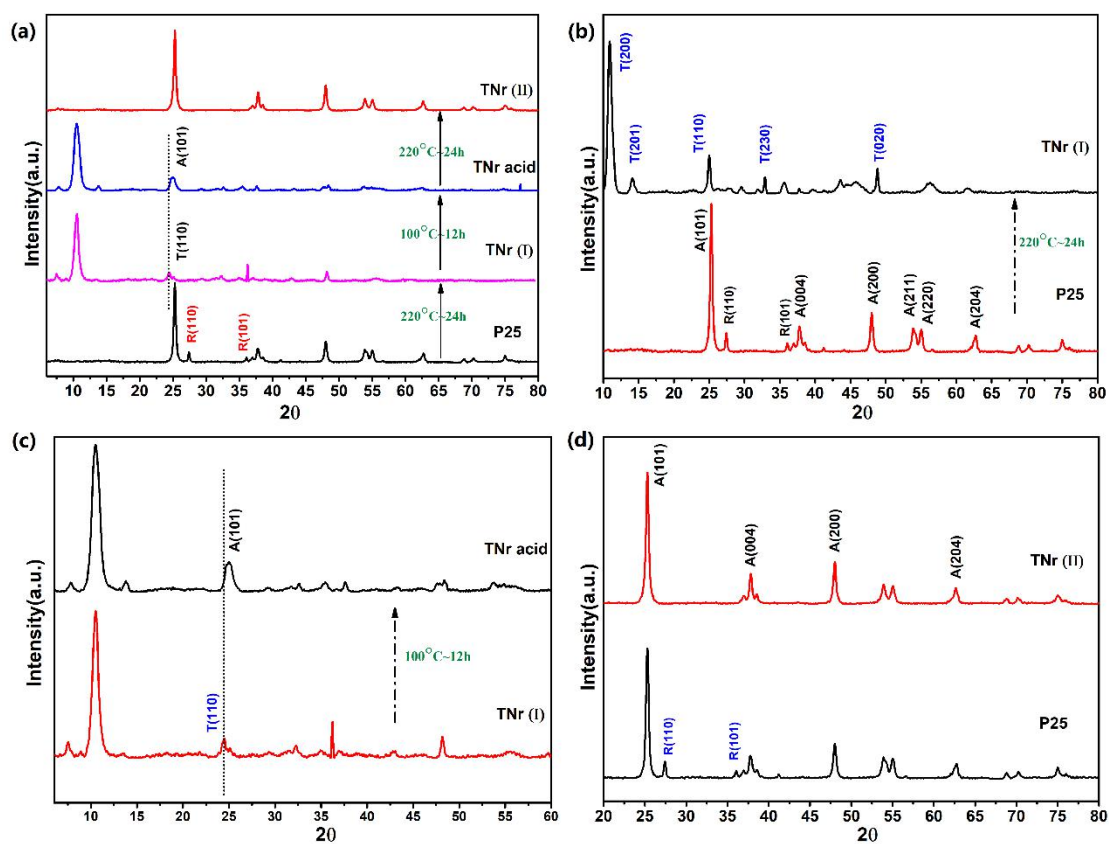

Fig. S2. XRD diffraction pattern of P25, TNR, TNR(I)<sub>aid</sub>, bare TNR (a); P25 and TNR (b); TNR and TNR(I)<sub>aid</sub> (c); P25 and bare TNR (d).

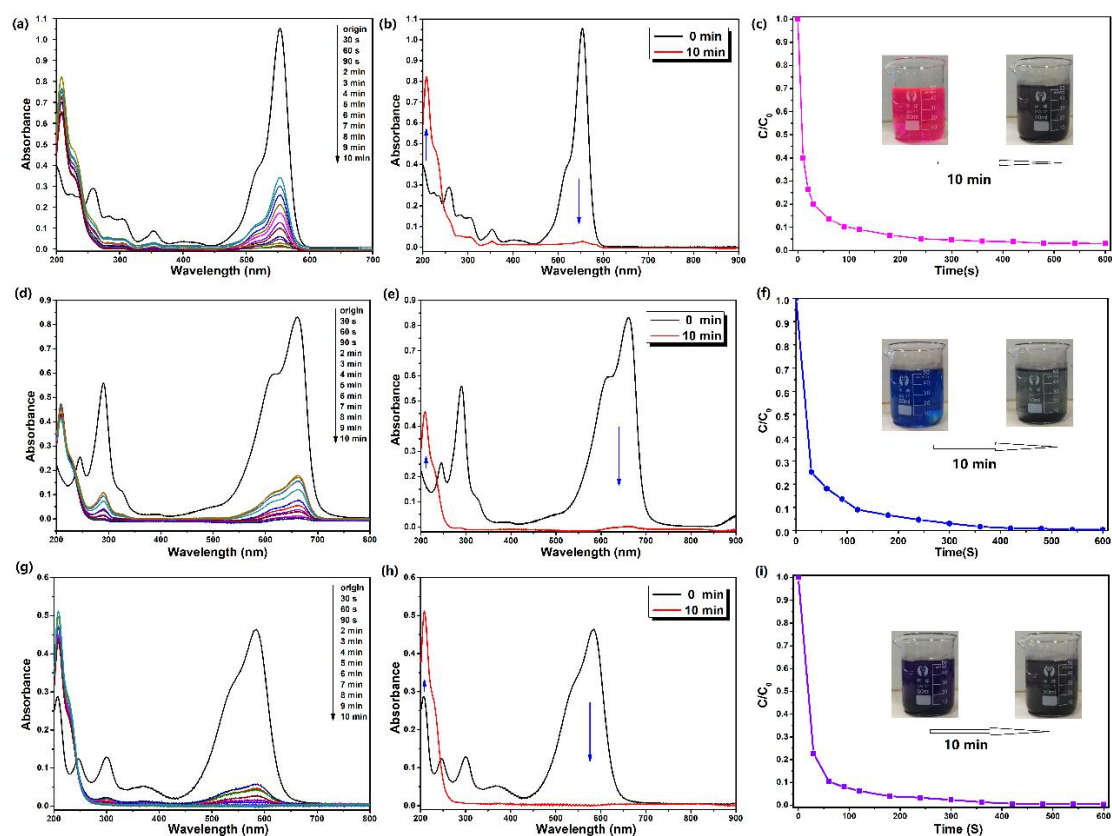

**Fig. S3.** The piezoelectric catalytic degradation of RhB, MB and CV solution by MoS<sub>2</sub>@TNR composites, the absorbance spectrum of the supernatant of the catalytic system and the corresponding degradation rate, the insets show the contrast of the solution color. Among them, (a~c) corresponding to RhB, (d~f) corresponding to MB, and (g~i) corresponding to CV.

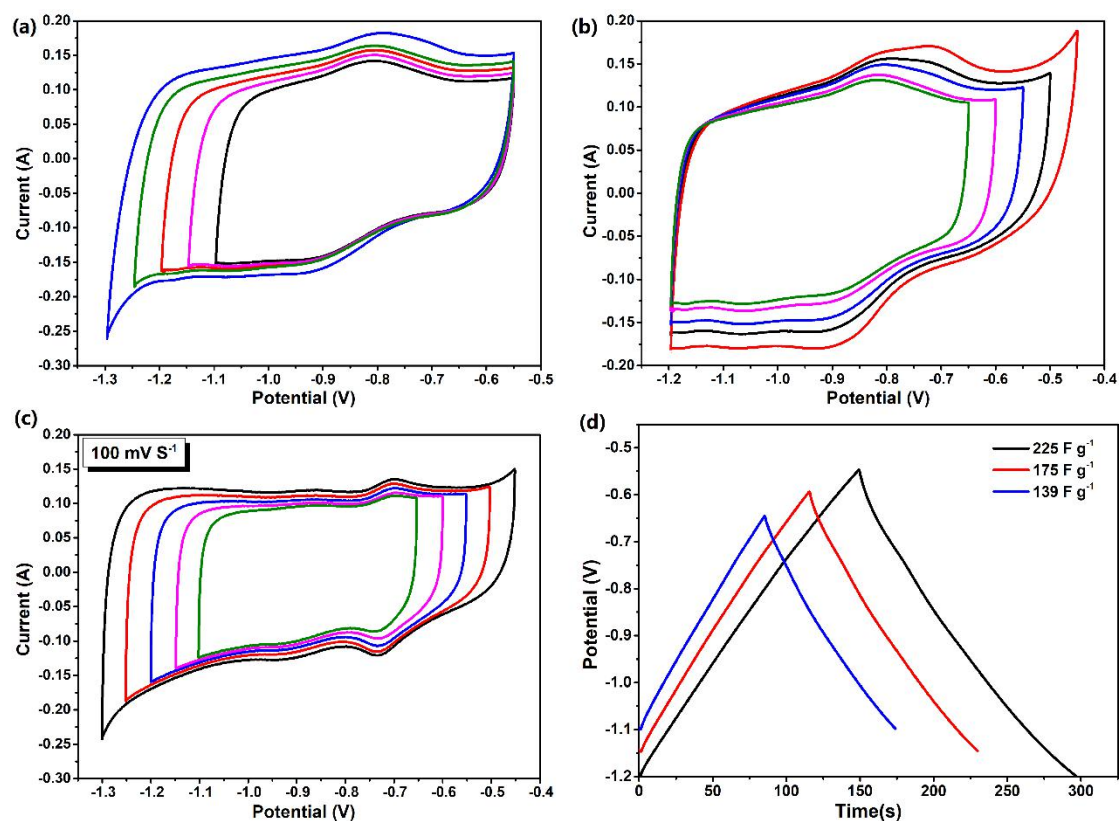

**Fig. S4.** The CV spectrum of the MoS<sub>2</sub>@TNr composites under the scan speed of 100 mV S<sup>-1</sup> with changing the voltage window values (a), (b) and (c); GCD curves at a current density of 1 A g<sup>-1</sup> for MoS<sub>2</sub>@TNr composites under different voltage values (d).

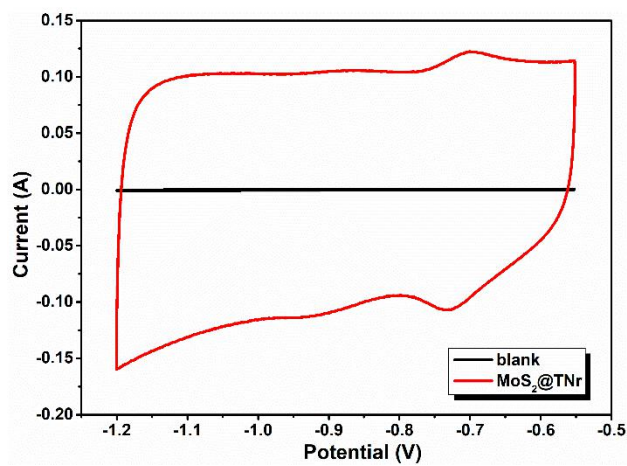

**Fig. S5.** CV curve of the blank electrode and MoS<sub>2</sub>@TNr composites electrode at the scanning speed of 100 mV S<sup>-1</sup> in Na<sub>2</sub>SO<sub>4</sub> solution (1 M).

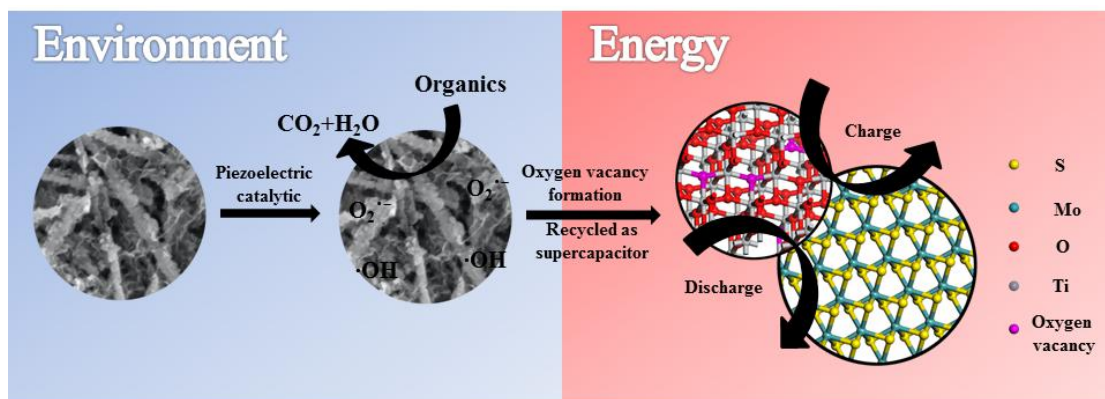

**Fig. S6.** Schematic diagram of the MoS<sub>2</sub>@TNr composites catalysts recycled as the electrode active materials for supercapacitors.
